# Supplementary material
Source: publisher site journal article supplement (https://www.spandidos-publications.com/8199/downloadSupplementary)

Figure S1. Subgroup analysis by study type (RCT vs. ANRCT). RCT, randomized controlled trials; NRCT, non-randomized controlled trials; Exp, experimental; Ctrl, control; MD, mean difference.

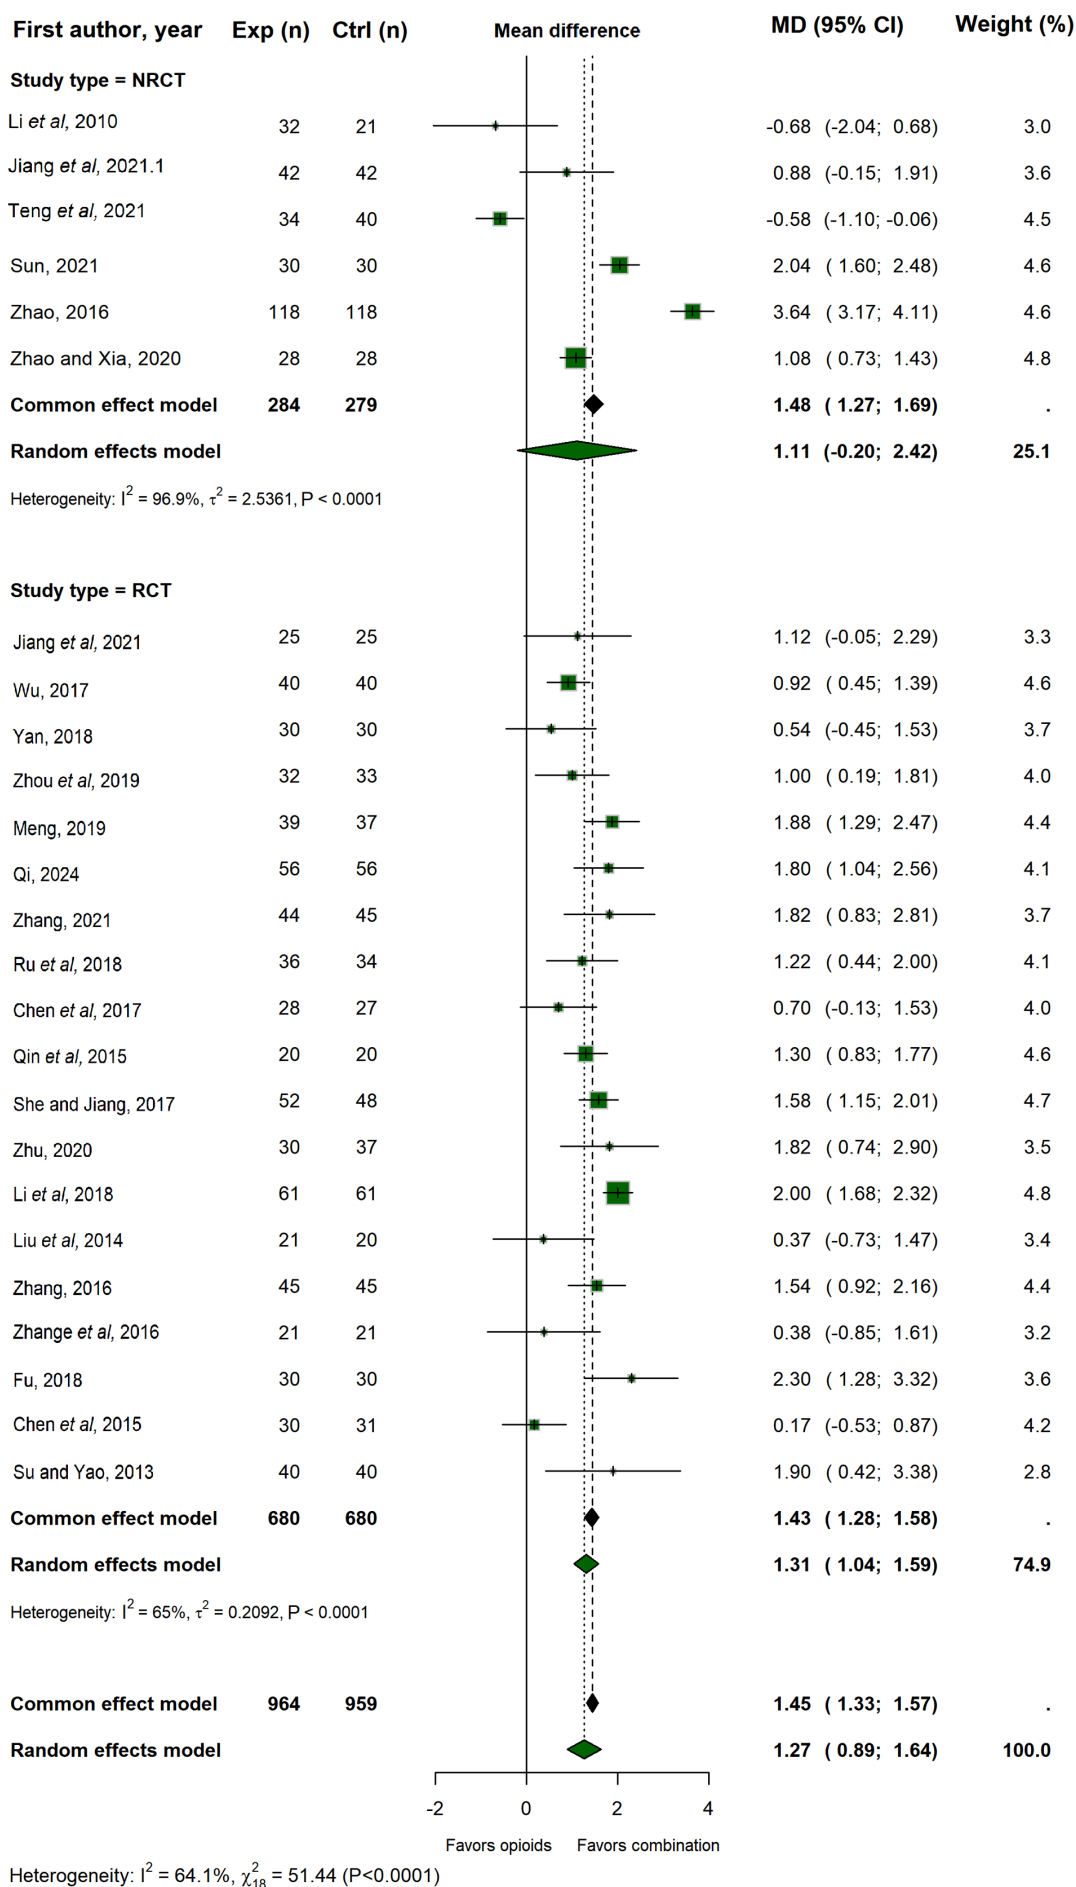

Figure S2. Subgroup analysis by sample size (small vs. large). MD, mean difference.

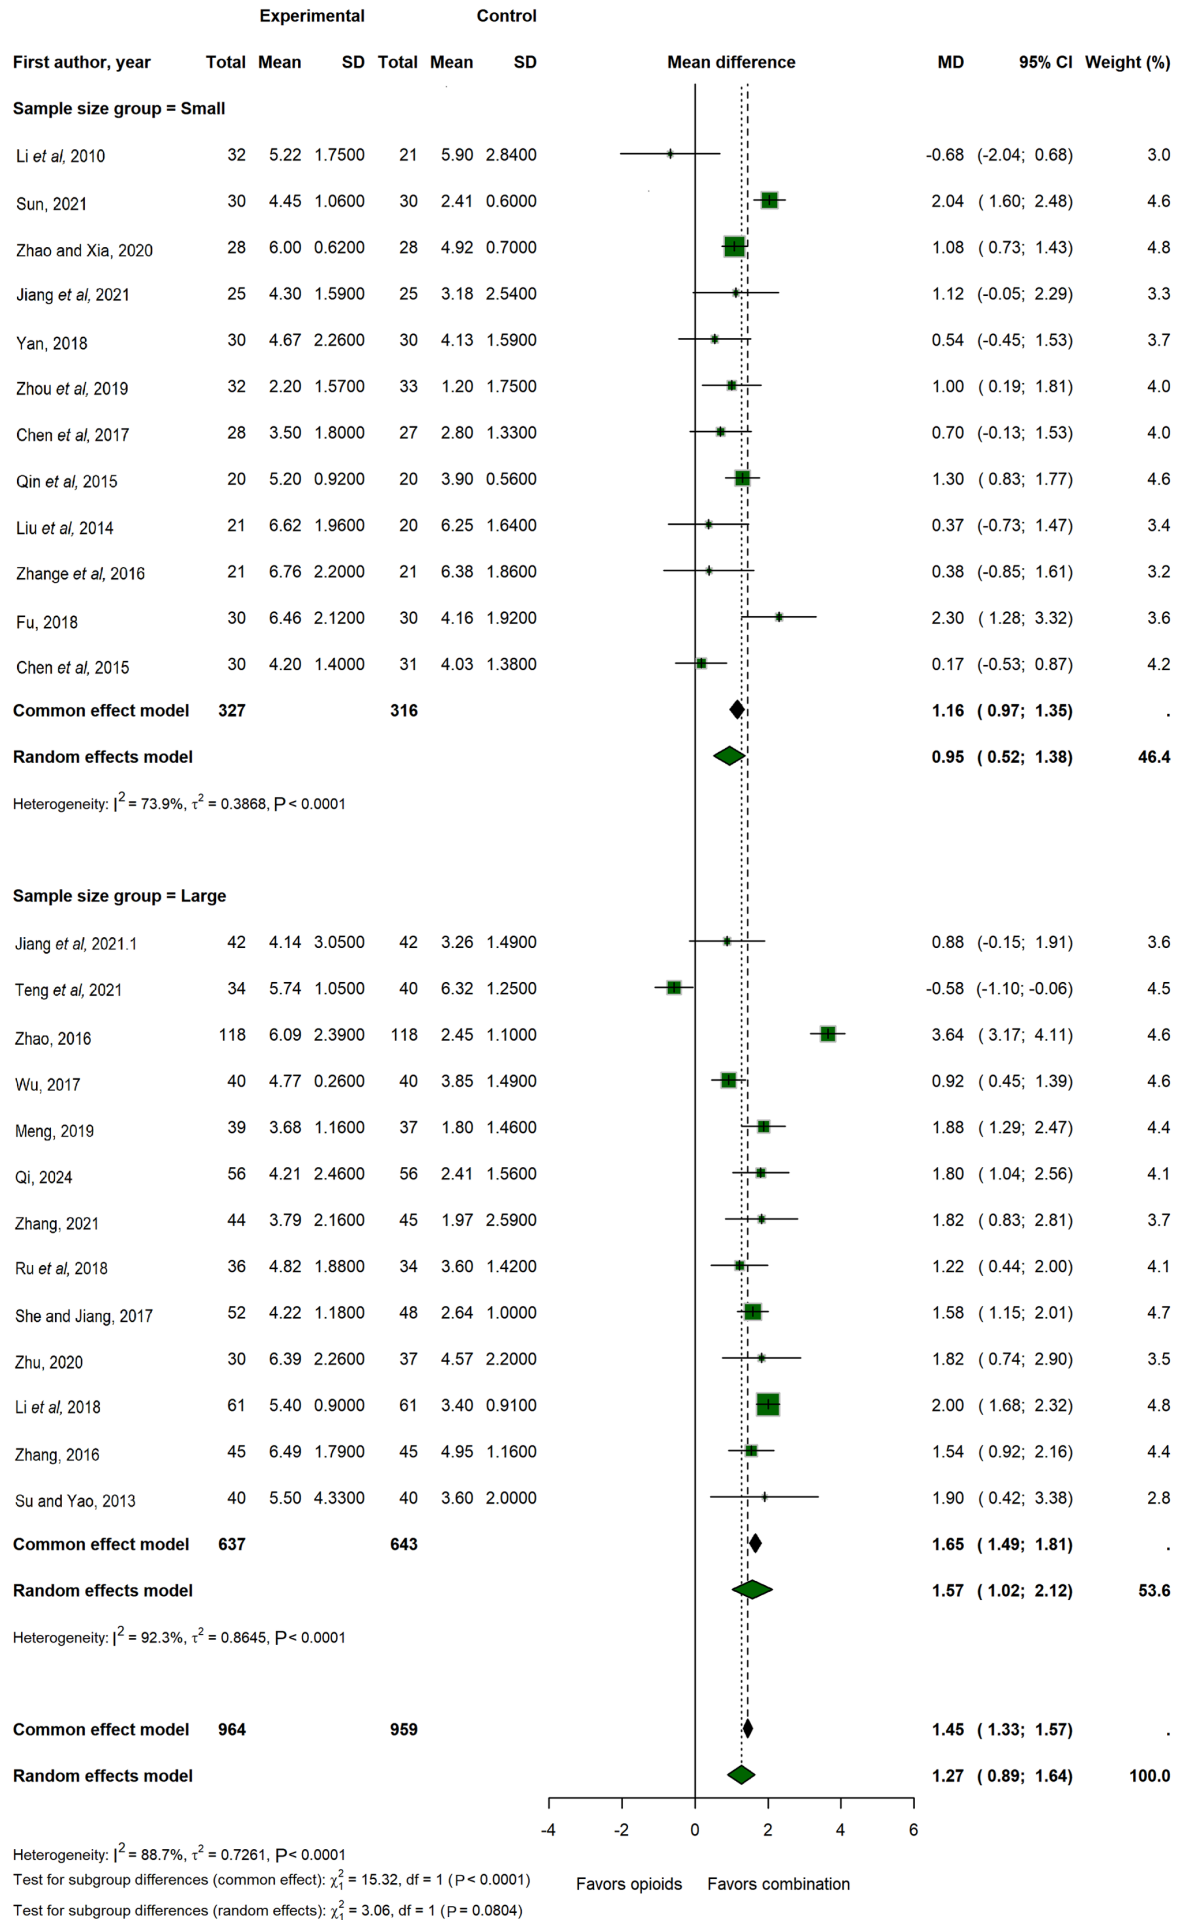

Figure S3. Subgroup analysis by treatment regimen (opioid type). IV, inverse-variance.

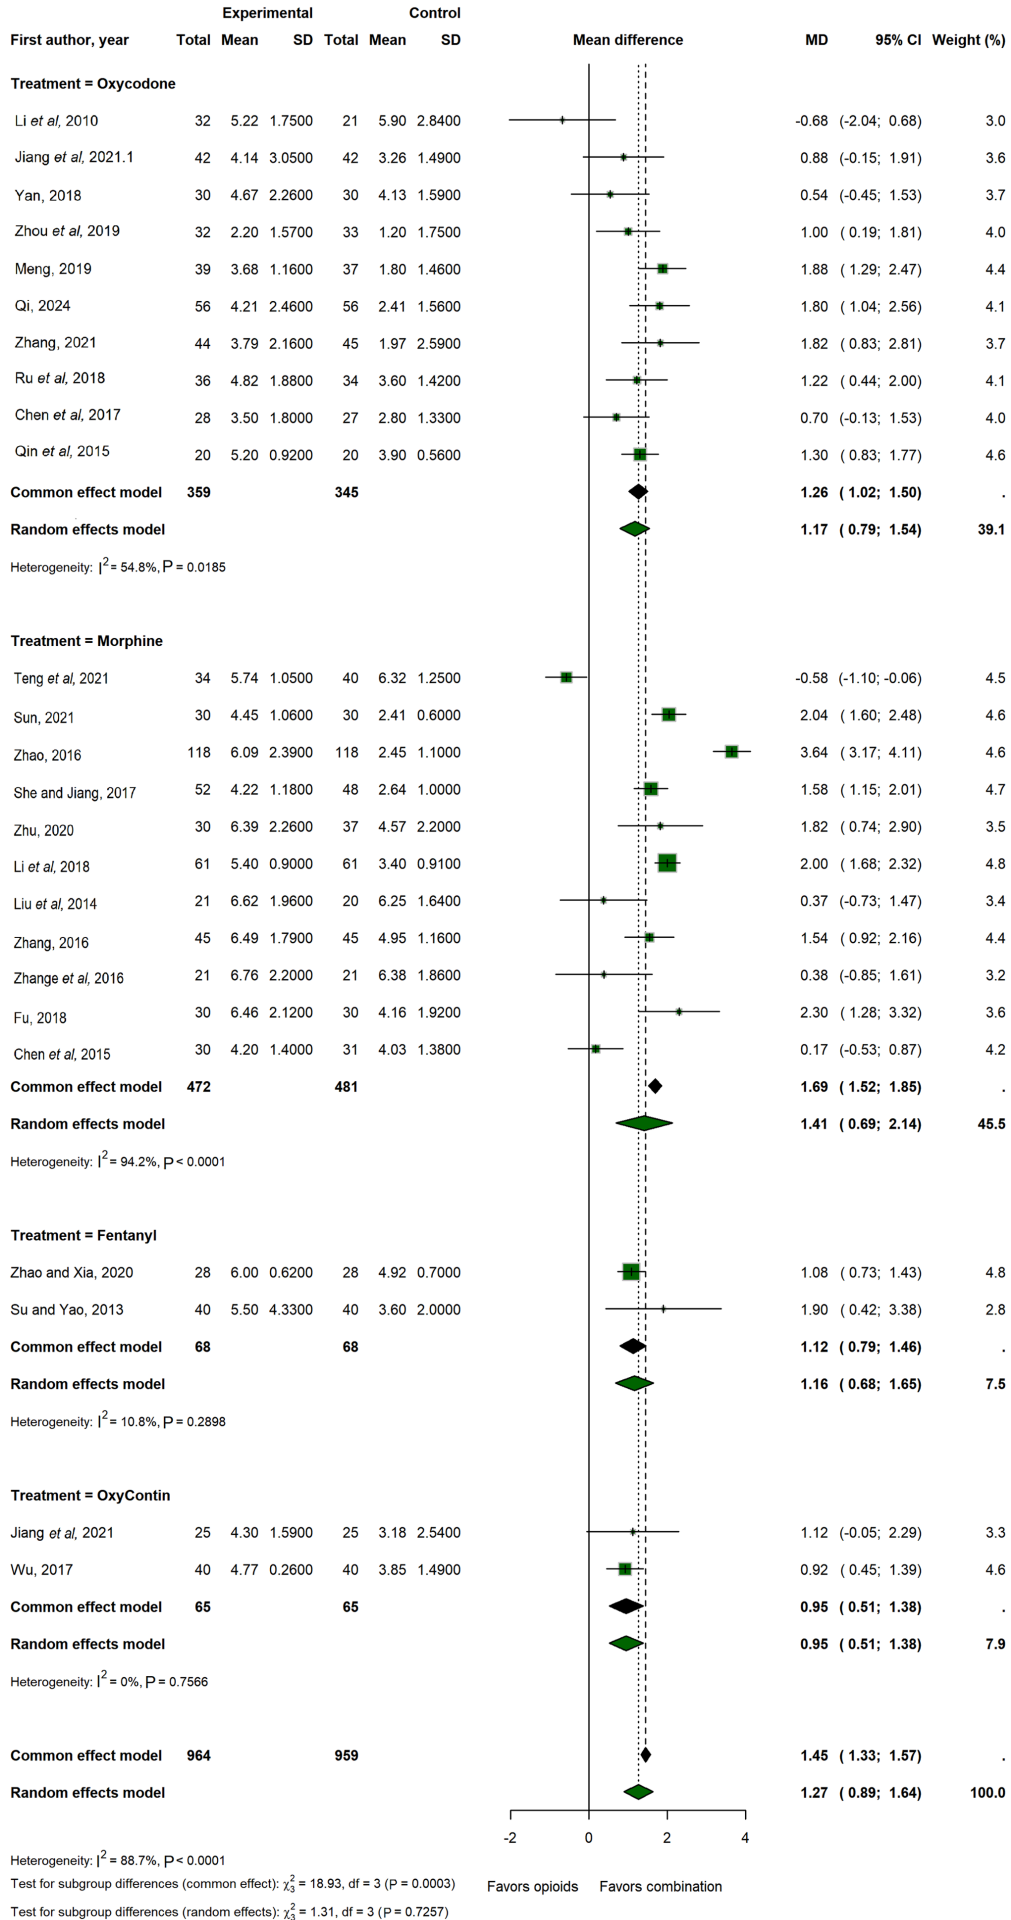

Figure S4. Sensitivity analysis excluding morphine studies. MD, mean difference.

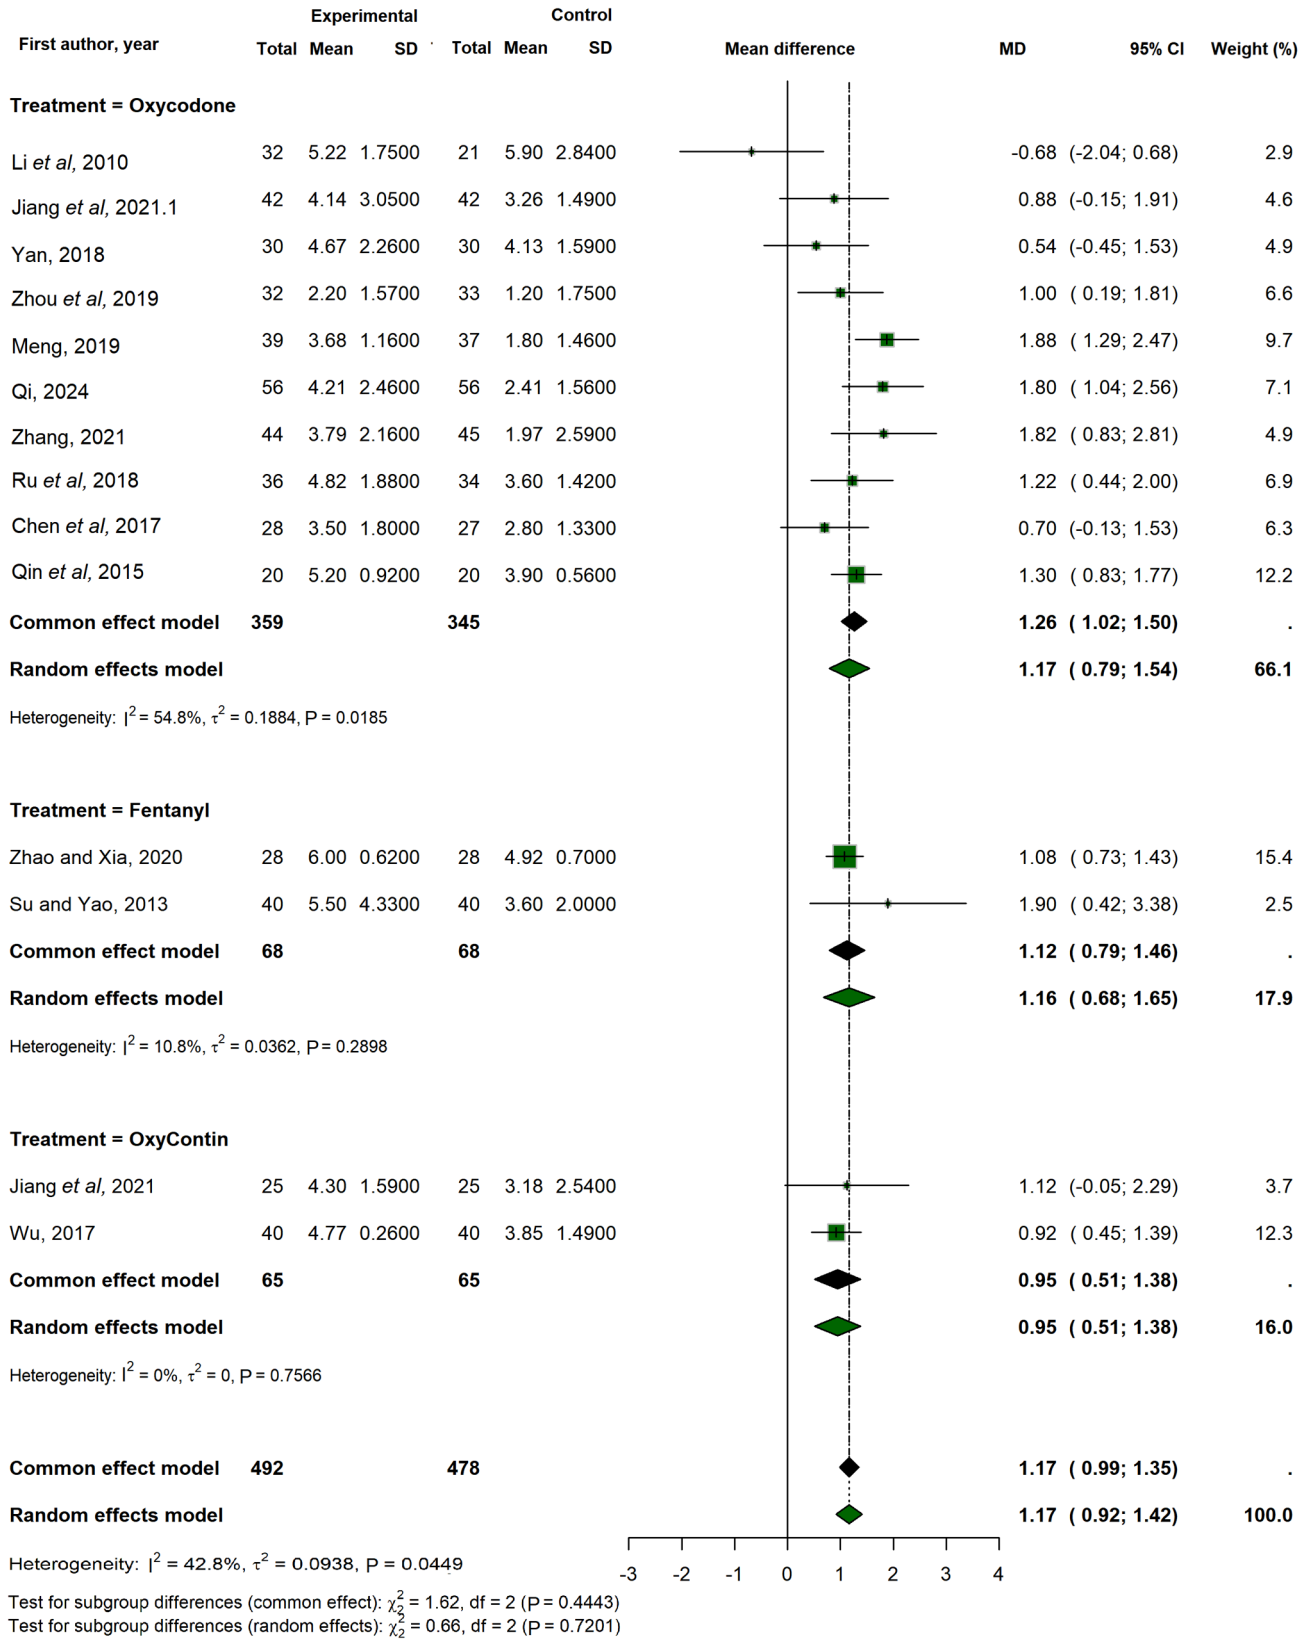

Figure S5. Subgroup analysis including RCTs only. RCTs, randomized controlled trials.

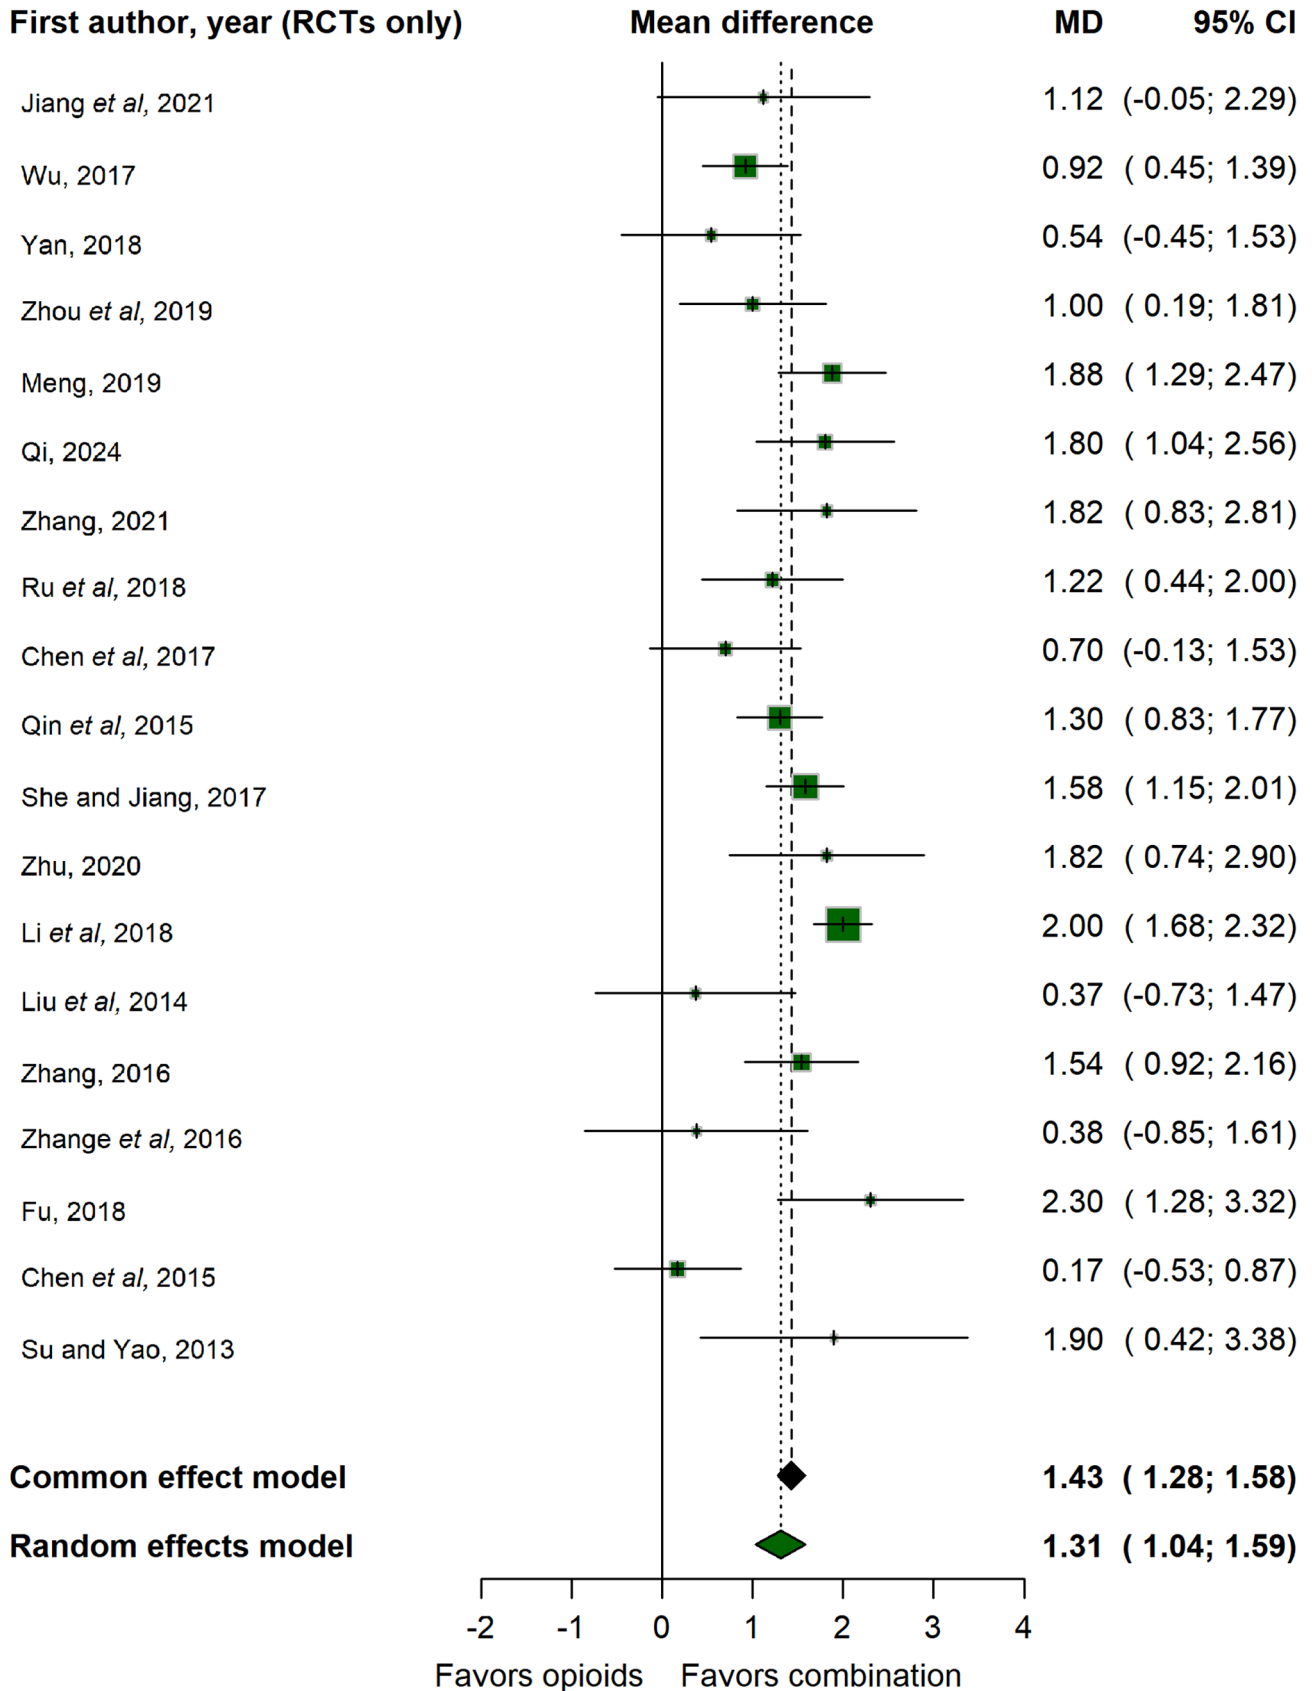

Figure S6. Leave-one-out sensitivity analysis.

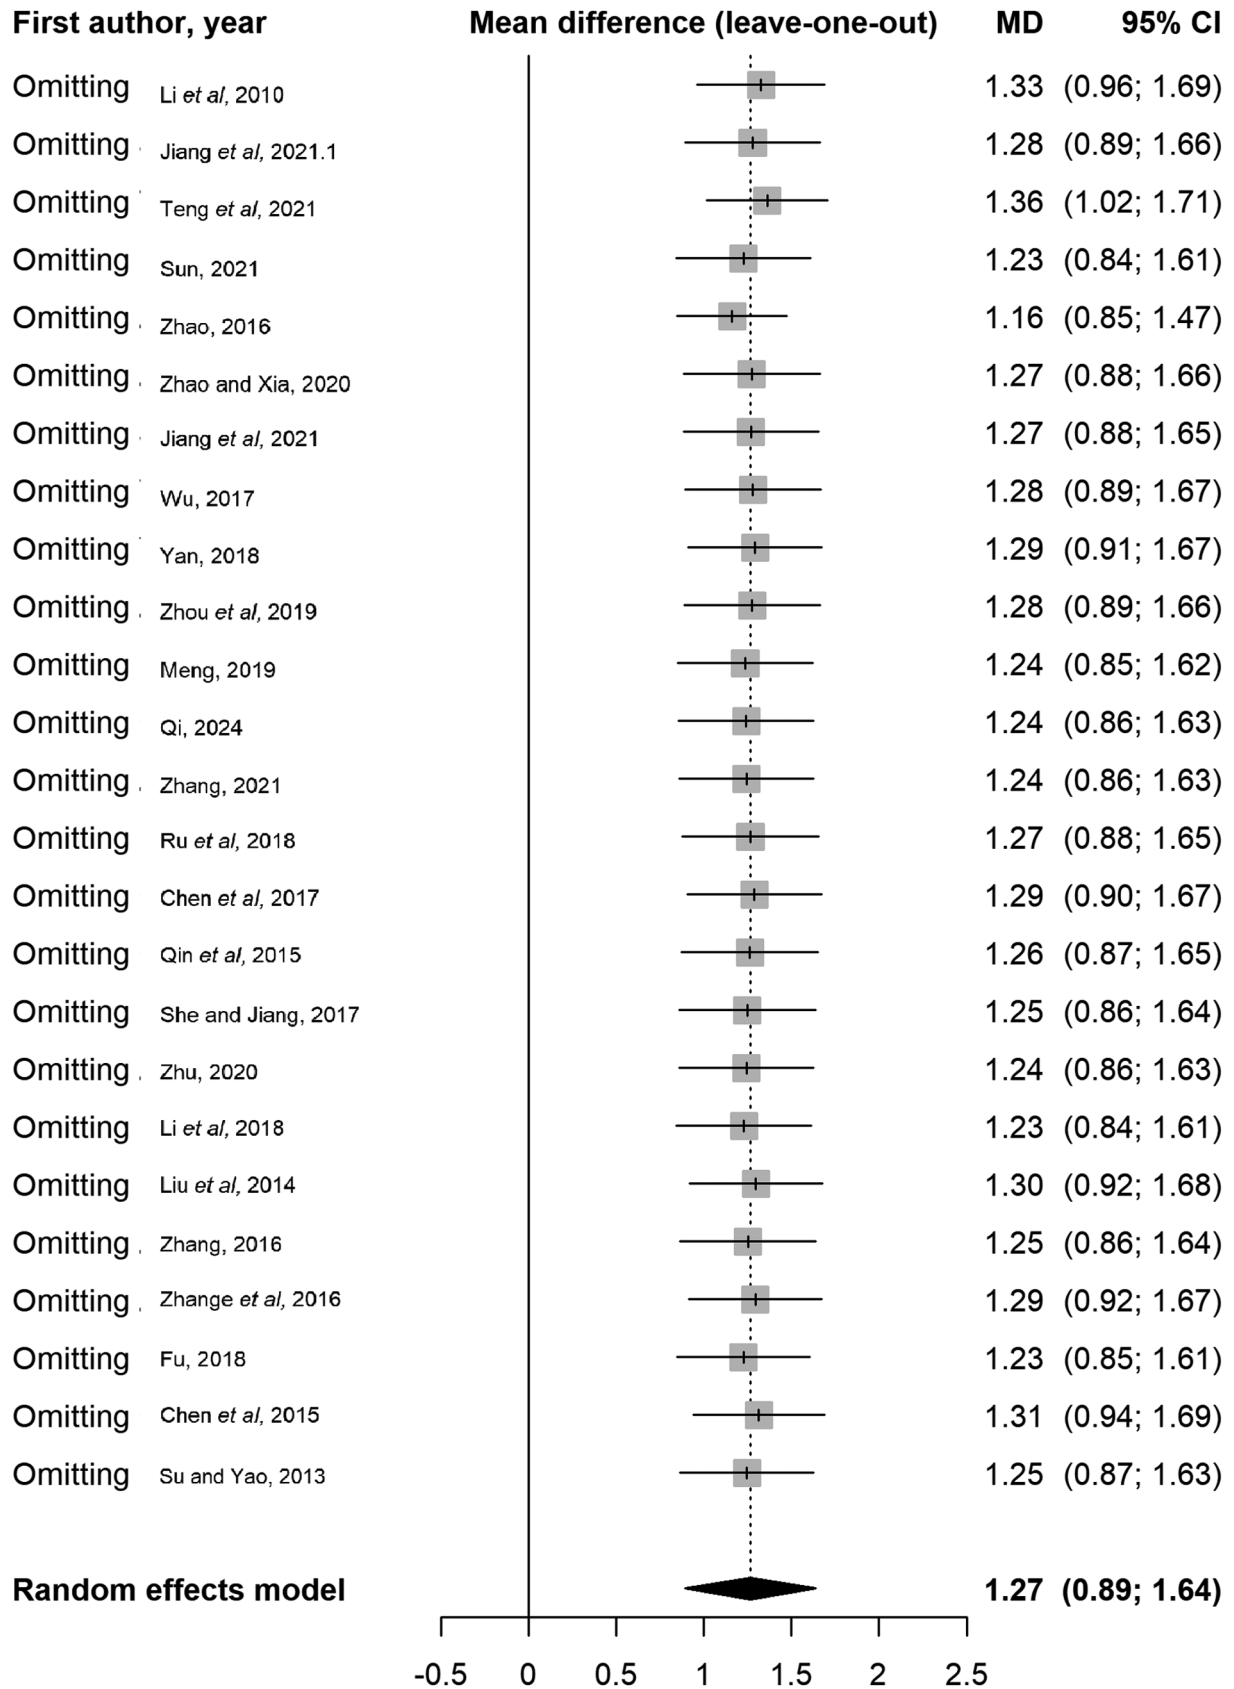

Supplement: Supplementary file 1 [file downloadSupplementary]
